# Supplementary material for: Novel Photoinduced Squalene Cyclic Peroxide Identified, Detected, and Quantified in Human Skin Surface Lipids
Source: MDPI journal article supplement (doi:10.3390/antiox10111760), 2021-11-04

## Supporting information I

### Novel photoinduced squalene cyclic peroxide identified, detected and quantified in human skin surface lipids

Saoussane Khalifa,<sup>a</sup> Masaru Enomoto,<sup>b</sup> Shunji Kato,<sup>a</sup> and Kiyotaka Nakagawa<sup>a,\*</sup>

<sup>a</sup> Food and Biodynamic Chemistry Laboratory, Graduate School of Agricultural Science, Tohoku University, Sendai 980-8577, Japan

<sup>b</sup> Applied Bioorganic Chemistry Laboratory, Graduate School of Agricultural Science, Tohoku University, Sendai 980-8577, Japan

\*Corresponding author:

Prof. K. Nakagawa

E-mail: [kiyotaka.nakagawa.c1@tohoku.ac.jp](mailto:kiyotaka.nakagawa.c1@tohoku.ac.jp)

#### Content:

1. MRM conditions for the method optimized for 2-OOH-3-(1,2-dioxane)-SQ.
2. Q1 and PIS conditions for the analysis of individual SQ-OOH isomers' secondary oxidation products.
3. Percentage of individual SQ-OOH isomers among total SQ-OOH isomers in SSLs
4. Comparison of the PIS obtained from 6-OOH-SQ and 2-OOH-3-(1,2-dioxane)-SQ, Q1 scan of photooxidized 10-OOH-SQ.
5. Schemes and Q1 scan of the derivatization reactions carried out for the identification of 2-OOH-3-(1,2-dioxane)-SQ.
6. Q1 scan of the photooxidation of 10-OOH-SQ after 4 hours and 8 hours.
7. Q1 scan of the reaction between Mxp and the secondary oxidation product of each SQ-OOH isomer.
8. <sup>1</sup>H NMR and <sup>13</sup>C NMR spectral data, 1D and 2D spectra of the major and minor isomers of 2-OOH-3-(1,2-dioxane)-SQ.

**1. MRM conditions for the method optimized for the analysis of 2-OOH-3-(1,2-dioxane)-SQ:**

**Table S1.** MRM conditions for the method optimized for 2-OOH-3-(1,2-dioxane)-SQ.

|                                            | Conditions |
|--------------------------------------------|------------|
|                                            | MRM        |
| Source                                     | ESI        |
| Ion polarity                               | Positive   |
| Declustering potential (V)                 | 75         |
| Entrance potential (V)                     | 10         |
| Temperature (°C)                           | 600        |
| Ion spray voltage (V)                      | 5500       |
| Curtain gas (psi)                          | 20         |
| Collision-activated dissociation gas (psi) | 7          |
| Collision energy (V)                       | 25         |
| Collision cell exit potential (V)          | 20         |
| Ion source gas 1 (psi)                     | 70         |
| Ion source gas 2 (psi)                     | 60         |

**2. Q1 and PIS conditions for the analysis of individual SQ-OOH isomers' secondary oxidation products:**

**Table S2.** Q1 and PIS conditions for the analysis of individual SQ-OOH isomers' secondary oxidation products.

|                               | <b>Q1</b> | <b>MS/MS</b> |
|-------------------------------|-----------|--------------|
| Source                        | ESI       | ESI          |
| Ion polarity                  | Positive  | Positive     |
| Mass range ( <i>m/z</i> )     | 50-700    | 50-700       |
| End plate offset (V)          | -500      | -500         |
| Capillary (V)                 | 4500      | 4500         |
| Nebulizer (bar)               | 1.6       | 1.6          |
| Dry gas (L/min)               | 6         | 6            |
| Dry heater (°C)               | 180       | 180          |
| Funnel 1RF (Vpp)              | 300       | 300          |
| Funnel 2RF (Vpp)              | 400       | 400          |
| Hexapole RF (Vpp)             | 400       | 400          |
| isCID energy                  | 0         | 0            |
| Ion energy (eV)               | 3         | 3            |
| Isolation mass ( <i>m/z</i> ) | 300       | 300          |
| Collision energy (eV)         | 14        | 30           |
| Collision (RF) (Vpp)          | 400       | 400          |
| Transfer time (μs)            | 70        | 70           |
| Peak width                    | 5         | 5            |

**3. Percentage of individual SQ-OOH isomers among total SQ-OOH isomers in SSLs:**

**Table S3.** Percentage of individual SQ-OOH isomers among total SQ-OOH isomers in SSLs.

| <b>Isomer</b>    | <b>Subject1</b> | <b>Subject2</b> | <b>Subject3</b> | <b>Subject4</b> | <b>Subject5</b> | <b>Subject6</b> |
|------------------|-----------------|-----------------|-----------------|-----------------|-----------------|-----------------|
| <b>11-OOH-SQ</b> | 11.5%           | 10.7%           | 10.5%           | 11.6%           | 9.8%            | 11.9%           |
| <b>7-OOH-SQ</b>  | 11.2%           | 11.9%           | 7.0%            | 10.2%           | 9.8%            | 12.1%           |
| <b>10-OOH-SQ</b> | 18.7%           | 21.2%           | 29.0%           | 24.5%           | 22.2%           | 23.1%           |
| <b>6-OOH-SQ</b>  | 17.3%           | 19.9%           | 15.6%           | 18.0%           | 17.3%           | 18.1%           |
| <b>3-OOH-SQ</b>  | 15.0%           | 14.9%           | 11.1%           | 14.2%           | 12.5%           | 15.2%           |
| <b>2-OOH-SQ</b>  | 26.3%           | 21.4%           | 26.7%           | 21.5%           | 28.4%           | 19.6%           |

4. Comparison of the PIS obtained from 6-OOH-SQ and 2-OOH-3-(1,2-dioxane)-SQ, Q1 scan of photooxidized 10-OOH-SQ:

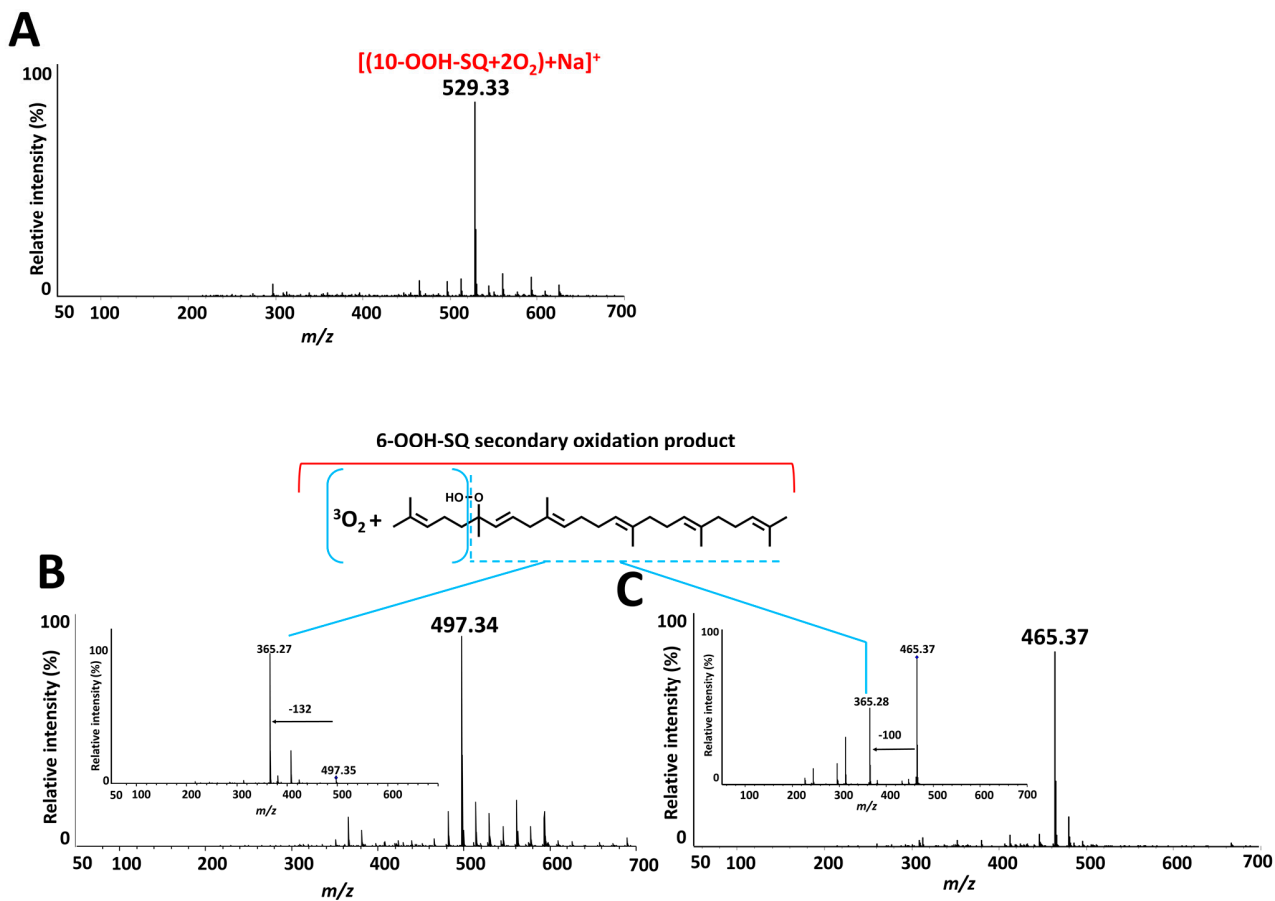

**Figure S1.** Q1 spectrum of photooxidized 10-OOH-SQ (4 hours) (A) and Q1 spectra and PIS of photooxidized 6-OOH-SQ (B) and unoxidized 6-OOH-SQ (C).

5. Schemes and Q1 scan of the derivatization reactions carried out for the identification of 2-OOH-3-(1,2-dioxane)-SQ:

• **Step1: reduction using Zinc dust**

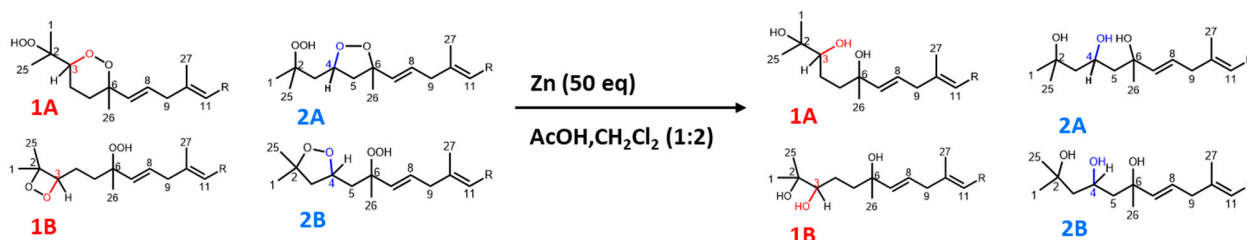

• **Step2: cleavage of vicinal alcohols using sodium periodate (NaIO<sub>4</sub>)**

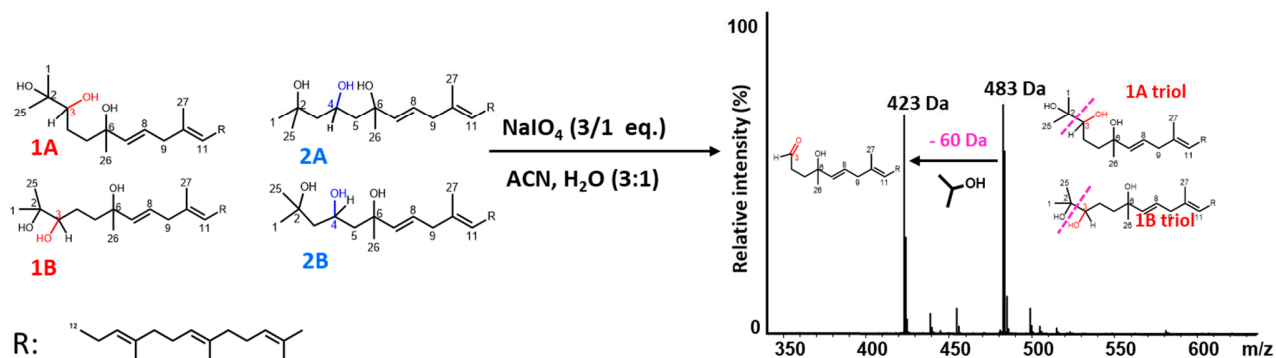

**Figure S2.** Derivatization reactions of SQ's main secondary oxidation product obtained from photooxidation of 6-OOH-SQ.

6. Q1 scan of the photooxidation of 10-OOH-SQ after 4 hours and 8 hours:

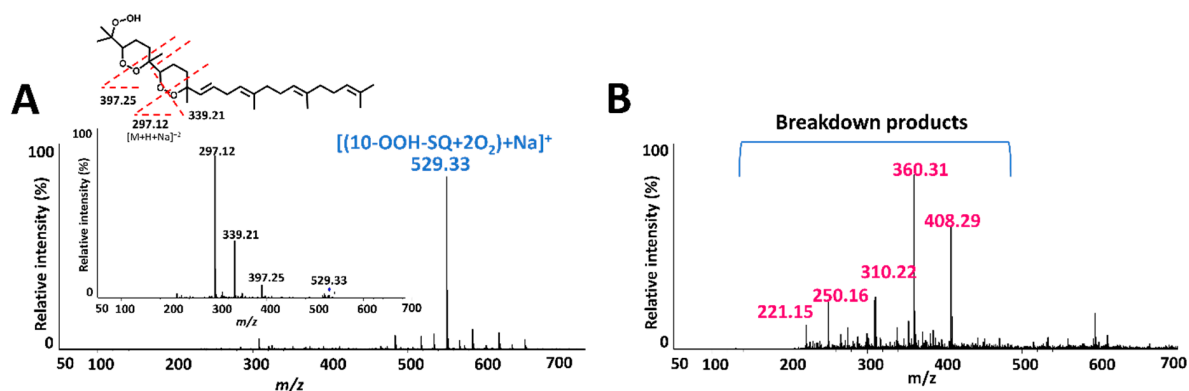

**Figure S3.** Formation of secondary oxidation product 2-OOH-3,7-di(1,2-dioxane)-SQ after 4 hours of oxidation of 10-OOH-SQ (Q1 + PIS) (A) and decomposition of the secondary oxidation product after 8 hours of oxidation (Q1) (B).

7. Q1 scan of the reaction between Mxp and the main secondary oxidation product of each SQ-OOH isomer.

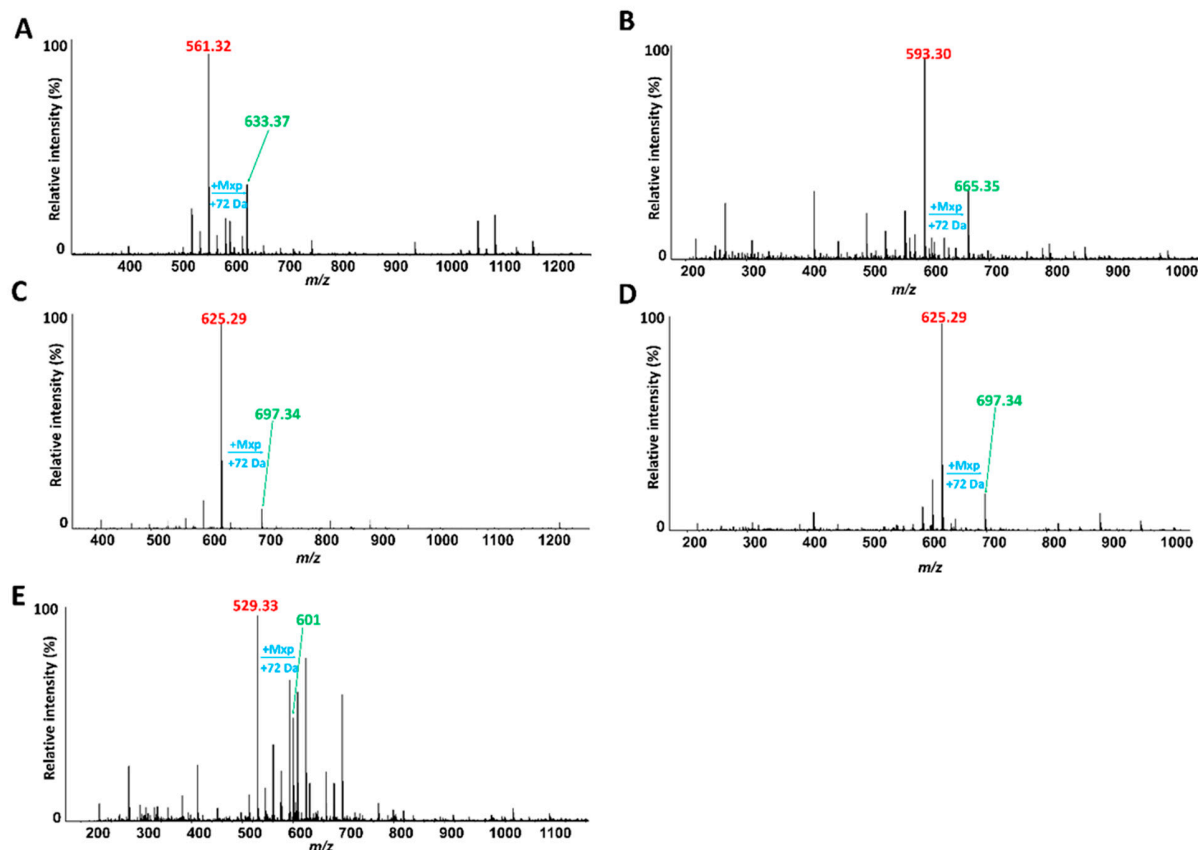

**Figure S4.** Mxp reaction with the crude sample of the secondary oxidation products obtained from the photooxidation of individual SQ-OOH isomers: (A) 11-OOH-SQ (containing mainly 11-OOH-SQ+3O<sub>2</sub>), (B) 7-OOH-SQ (containing mainly 7-OOH-SQ+4O<sub>2</sub>), (C) 3-OOH-SQ (containing mainly 3-OOH-SQ+5O<sub>2</sub>), (D) 2-OOH-SQ (containing mainly 2-OOH-SQ+5O<sub>2</sub>) and (E) 10-OOH-SQ (containing mainly 10-OOH-SQ+2O<sub>2</sub>).

**8.**  $^1\text{H}$  NMR and  $^{13}\text{C}$  NMR spectral data of the major and minor isomers of 2-OOH-3-(1,2-dioxane)-SQ:

**Table S4.**  $^1\text{H}$  NMR and  $^{13}\text{C}$  NMR spectral data of the major isomer of 2-OOH-3-(1,2-dioxane)-SQ.

| Position | $^1\text{H}$ NMR ( $\text{CDCl}_3$ , 600 M Hz)              | $^{13}\text{C}$ NMR ( $\text{CDCl}_3$ , 150 M Hz) |
|----------|-------------------------------------------------------------|---------------------------------------------------|
| 1        | 1.21 (3H, s)                                                | 21.0                                              |
| 2        | —                                                           | 83.3                                              |
| 3        | 4.23 (1H, dd $J = 10.5$ 3.3 Hz)                             | 84.7                                              |
| 4        | 1.58-1.62 (1H, overlapping),<br>1.80-1.86 (1H, overlapping) | 20.4                                              |
| 5        | 1.72-1.80 (1H, overlapping),<br>1.86-1.90 (1H, overlapping) | 32.9                                              |
| 6        | —                                                           | 80.7                                              |
| 7        | 5.66 (1H, d, $J = 15.6$ Hz)                                 | 134.0                                             |
| 8        | 5.57 (1H, dt, $J = 15.6$ , 7.2 Hz)                          | 129.0                                             |
| 9        | 2.71 (2H, d, $J = 6.6$ Hz)                                  | 42.8                                              |
| 10       | —                                                           | 133.7                                             |
| 11       | 5.16-5.20 (1H, overlapping)                                 | 125.5                                             |
| 12       | 1.98-2.04 (2H, overlapping)                                 | 26.6, 26.7, 28.1, 28.2, 28.3, or 28.4             |
| 13       | 1.90-2.12 (2H, overlapping)                                 | 26.6, 26.7, 28.1, 28.2, 28.3, or 28.4             |
| 14       | 5.08-5.16 (1H, overlapping)                                 | 124.14, 124.22, or 124.37                         |
| 15       | —                                                           | 135.2 or 134.9                                    |
| 16       | 1.90-2.12 (2H, overlapping)                                 | 26.6, 26.7, 28.1, 28.2, 28.3, or 28.4             |
| 17       | 1.90-2.12 (2H, overlapping)                                 | 26.6, 26.7, 28.1, 28.2, 28.3, or 28.4             |
| 18       | 5.08-5.16 (1H, overlapping)                                 | 124.14, 124.22, or 124.37                         |
| 19       | —                                                           | 135.2 or 134.9                                    |
| 20       | 1.90-2.12 (2H, overlapping)                                 | 26.6, 26.7, 28.1, 28.2, 28.3, or 28.4             |
| 21       | 1.90-2.12 (2H, overlapping)                                 | 26.6, 26.7, 28.1, 28.2, 28.3, or 28.4             |
| 22       | 5.08-5.16 (1H, overlapping)                                 | 124.14, 124.22, or 124.37                         |
| 23       | —                                                           | 131.3                                             |



|           |              |              |
|-----------|--------------|--------------|
| <b>24</b> | 1.68 (3H, s) | 25.7         |
| <b>25</b> | 1.21 (3H, s) | 21.0         |
| <b>26</b> | 1.20 (3H, s) | 26.9         |
| <b>27</b> | 1.59 (3H, s) | 16.1         |
| <b>28</b> | 1.60 (3H, s) | 20.9 or 20.3 |
| <b>29</b> | 1.60 (3H, s) | 20.9 or 20.3 |
| <b>30</b> | 1.60 (3H, s) | 17.7         |

**Table S5.** <sup>1</sup>H NMR and <sup>13</sup>C NMR spectral data of the minor isomer of 2-OOH-3-(1,2-dioxane)-SQ.

| <b>position</b> | <b><sup>1</sup>H NMR (CDCl<sub>3</sub>, 600 M Hz)</b>       | <b><sup>13</sup>C NMR (CDCl<sub>3</sub>, 150 M Hz)</b> |
|-----------------|-------------------------------------------------------------|--------------------------------------------------------|
| <b>1</b>        | 1.24 (3H, s)                                                | 20.9                                                   |
| <b>2</b>        | —                                                           | 83.2                                                   |
| <b>3</b>        | 4.22 (1H, dd, <i>J</i> = 10.5, 3.3 Hz)                      | 84.7                                                   |
| <b>4</b>        | 1.66-1.72 (1H, overlapping),<br>1.84-1.90 (1H, overlapping) | 20.4                                                   |
| <b>5</b>        | 1.72-1.80 (1H, overlapping)<br>2.02-2.06 (1H, overlapping)  | 32.7                                                   |
| <b>6</b>        | —                                                           | 79.9                                                   |
| <b>7</b>        | 5.44 (1H, d, <i>J</i> = 16.2 Hz)                            | 134.1                                                  |
| <b>8</b>        | 5.68 (1H, dt, <i>J</i> = 15.6, 7.2 Hz)                      | 130.4                                                  |
| <b>9</b>        | 2.69 (2H, d, <i>J</i> = 6.6 Hz)                             | 42.8                                                   |
| <b>10</b>       | —                                                           | 133.2                                                  |
| <b>11</b>       | 5.16-5.20 (1H, overlapping)                                 | 125.7                                                  |
| <b>12</b>       | 1.98-2.04 (2H, overlapping)                                 | 26.6, 26.7, 28.1, 28.2, 28.3, or 28.4                  |
| <b>13</b>       | 1.90-2.12 (2H, overlapping)                                 | 26.6, 26.7, 28.1, 28.2, 28.3, or 28.4                  |
| <b>14</b>       | 5.08-5.16 (1H, overlapping)                                 | 124.10, 124.22, or 124.37                              |
| <b>15</b>       | —                                                           | 135.2 or 134.9                                         |
| <b>16</b>       | 1.90-2.12 (2H, overlapping)                                 | 26.6, 26.7, 28.1, 28.2, 28.3, or 28.4                  |

|           |                             |                                       |
|-----------|-----------------------------|---------------------------------------|
| <b>17</b> | 1.90-2.12 (2H, overlapping) | 26.6, 26.7, 28.1, 28.2, 28.3, or 28.4 |
| <b>18</b> | 5.08-5.16 (1H, overlapping) | 124.10, 124.22, or 124.37             |
| <b>19</b> | —                           | 135.2 or 134.9                        |
| <b>20</b> | 1.90-2.12 (2H, overlapping) | 26.6, 26.7, 28.1, 28.2, 28.3, or 28.4 |
| <b>21</b> | 1.90-2.12 (2H, overlapping) | 26.6, 26.7, 28.1, 28.2, 28.3, or 28.4 |
| <b>22</b> | 5.08-5.16 (1H, overlapping) | 124.10, 124.22, or 124.37             |
| <b>23</b> | —                           | 131.3                                 |
| <b>24</b> | 1.68 (3H, s)                | 25.7                                  |
| <b>25</b> | 1.28 (3H, s)                | 21.2                                  |
| <b>26</b> | 1.48 (3H, s)                | 20.9                                  |
| <b>27</b> | 1.59 (3H, s)                | 16.1                                  |
| <b>28</b> | 1.60 (3H, s)                | 20.9 or 20.3                          |
| <b>29</b> | 1.60 (3H, s)                | 20.9 or 20.3                          |
| <b>30</b> | 1.60 (3H, s)                | 17.7                                  |

$^1\text{H}$  NMR

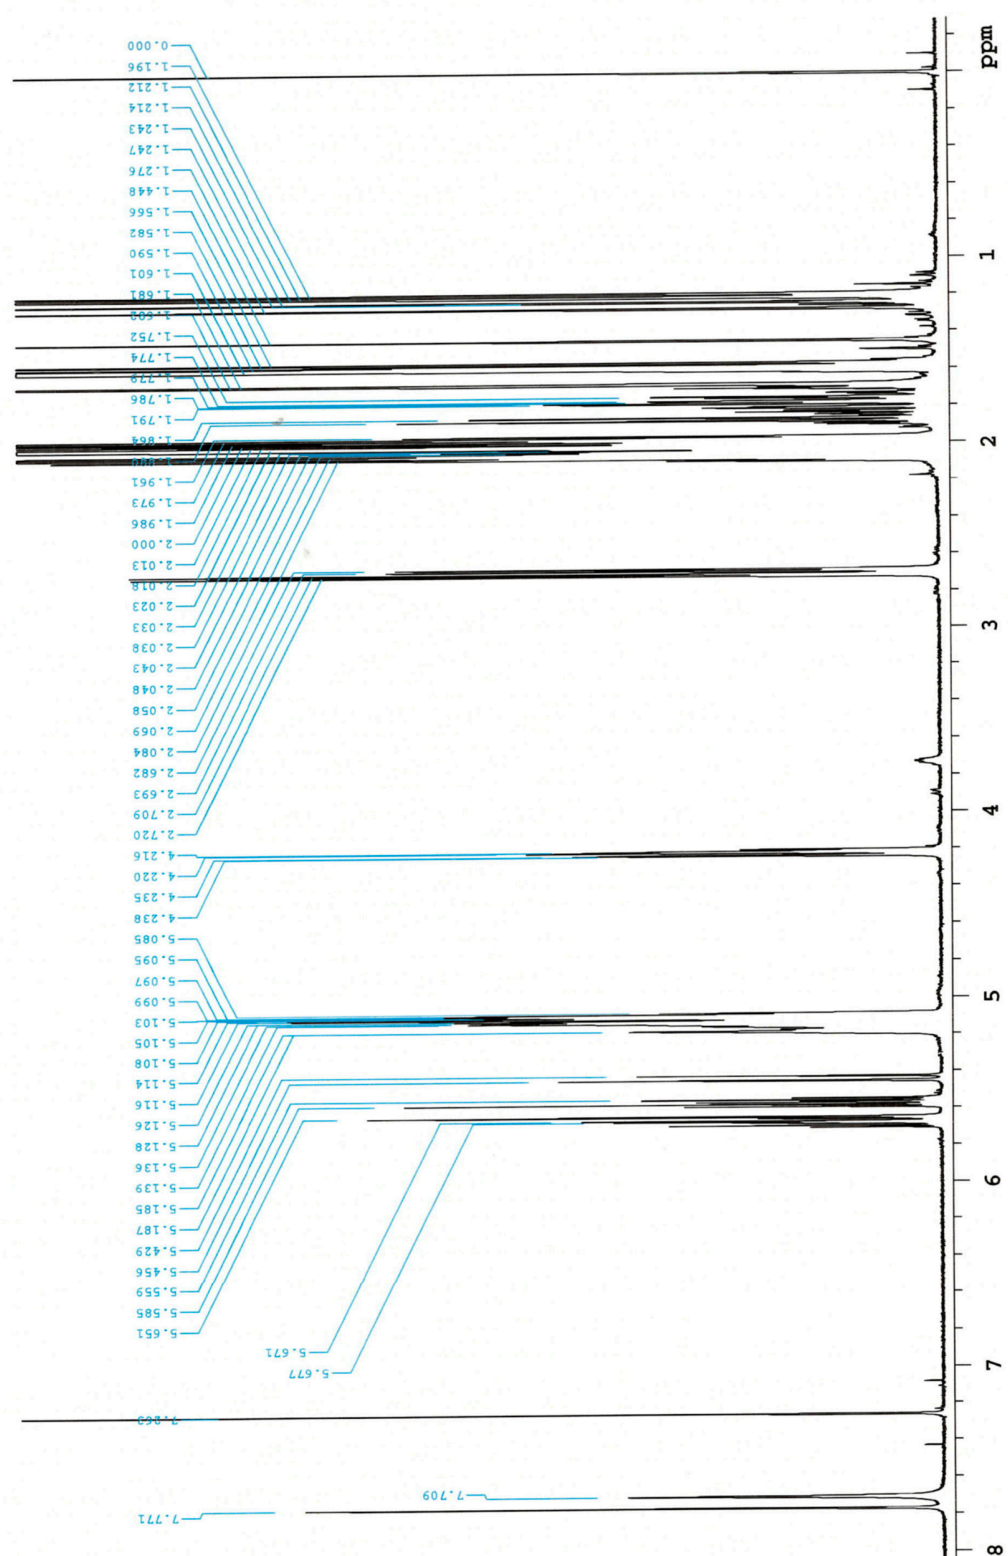

$^{13}\text{C}$  NMR

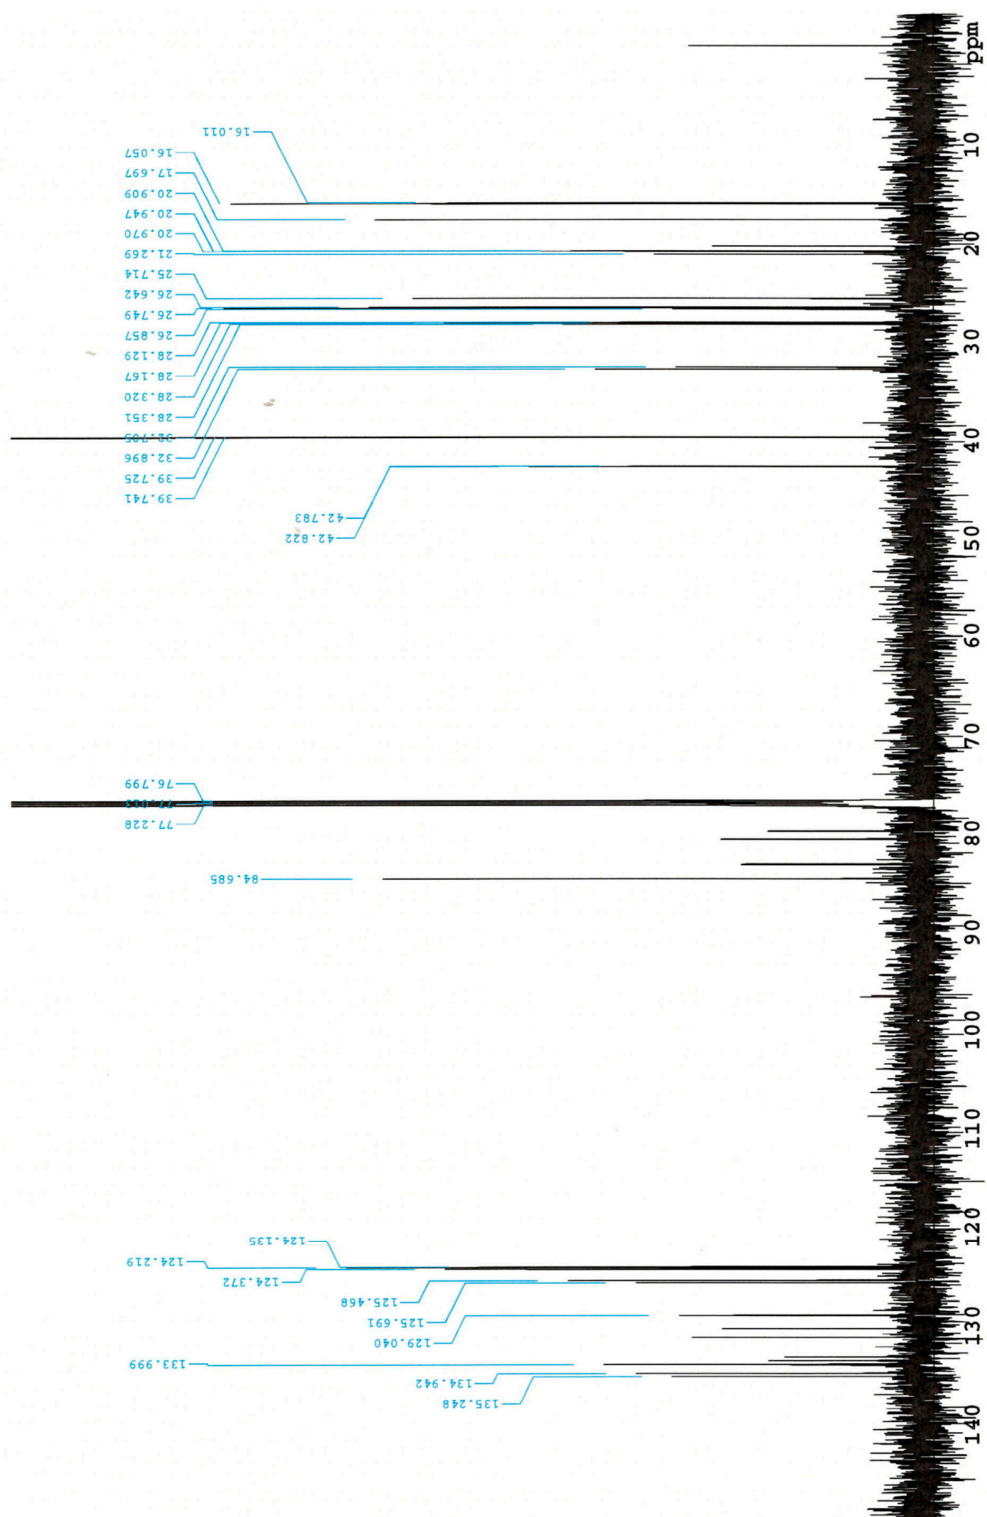

DEPT

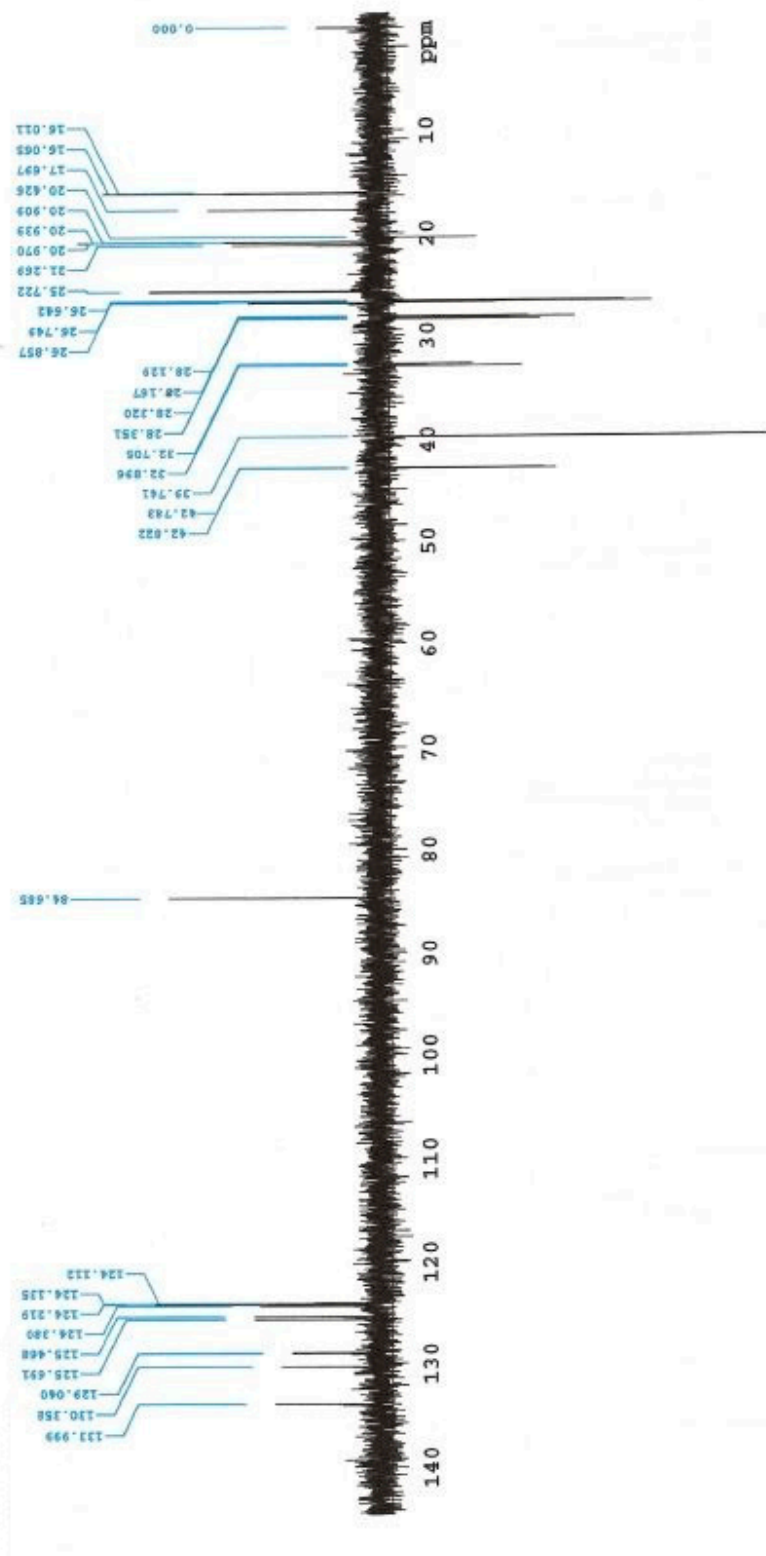

HMBC

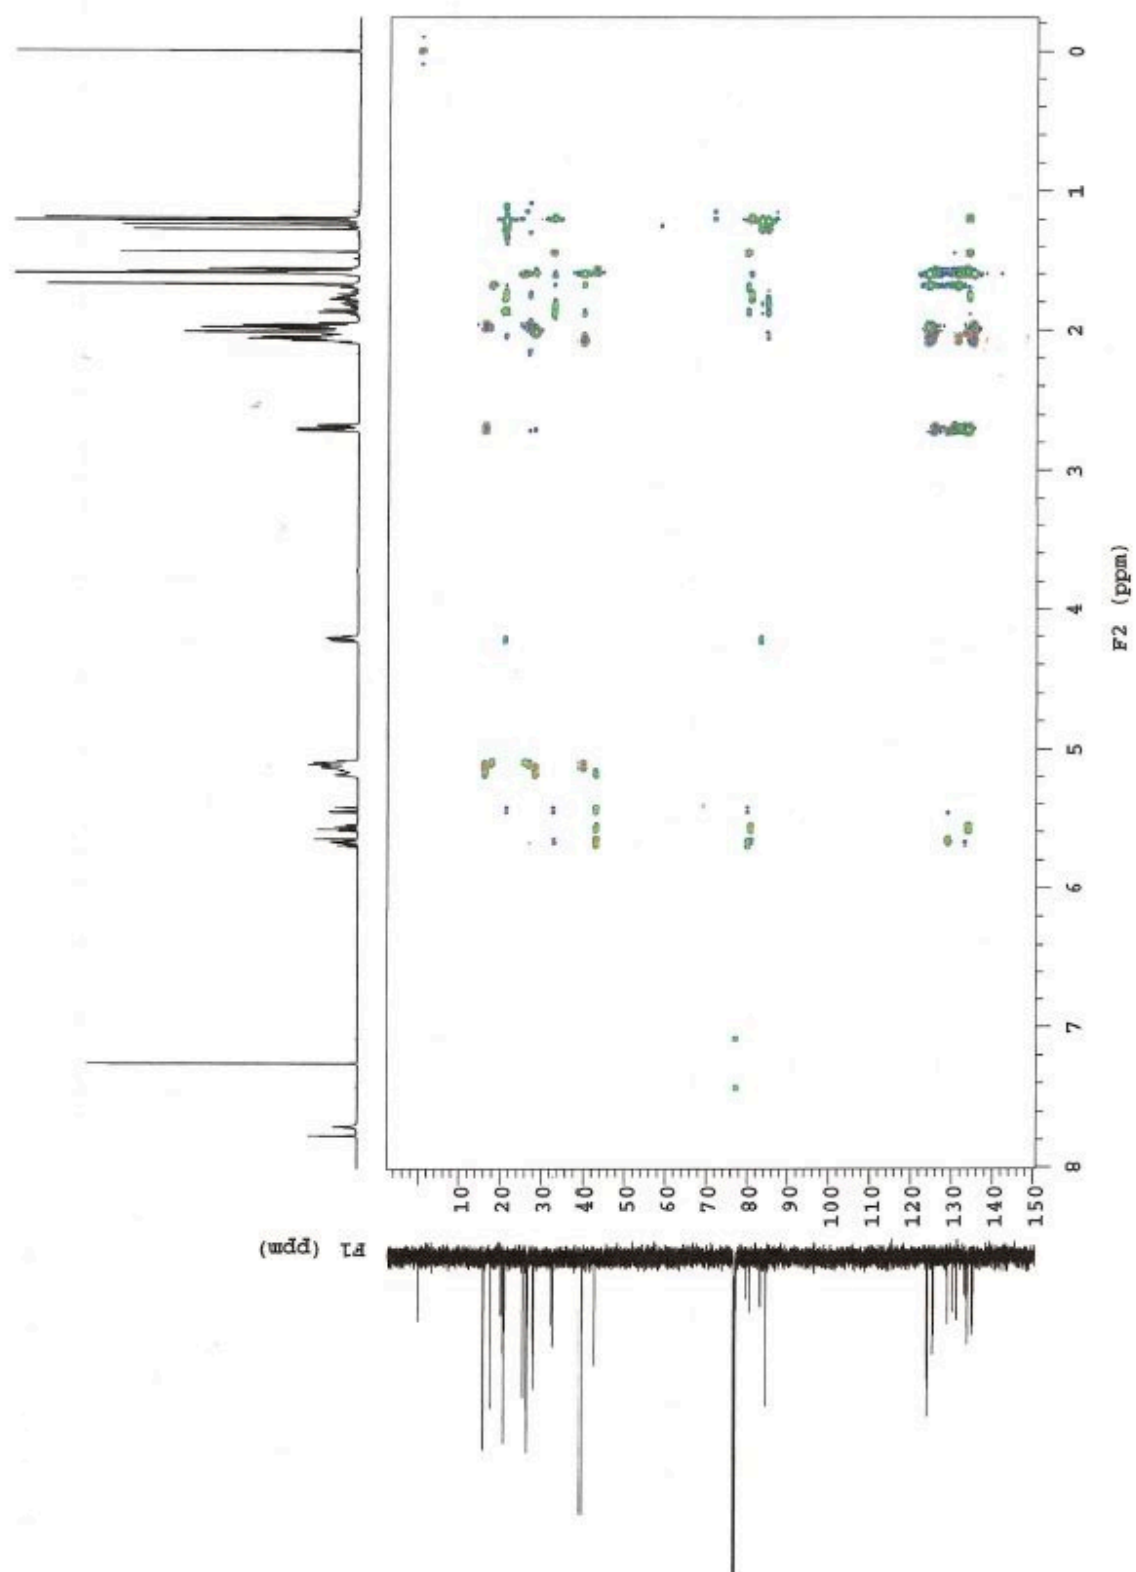

HSQC

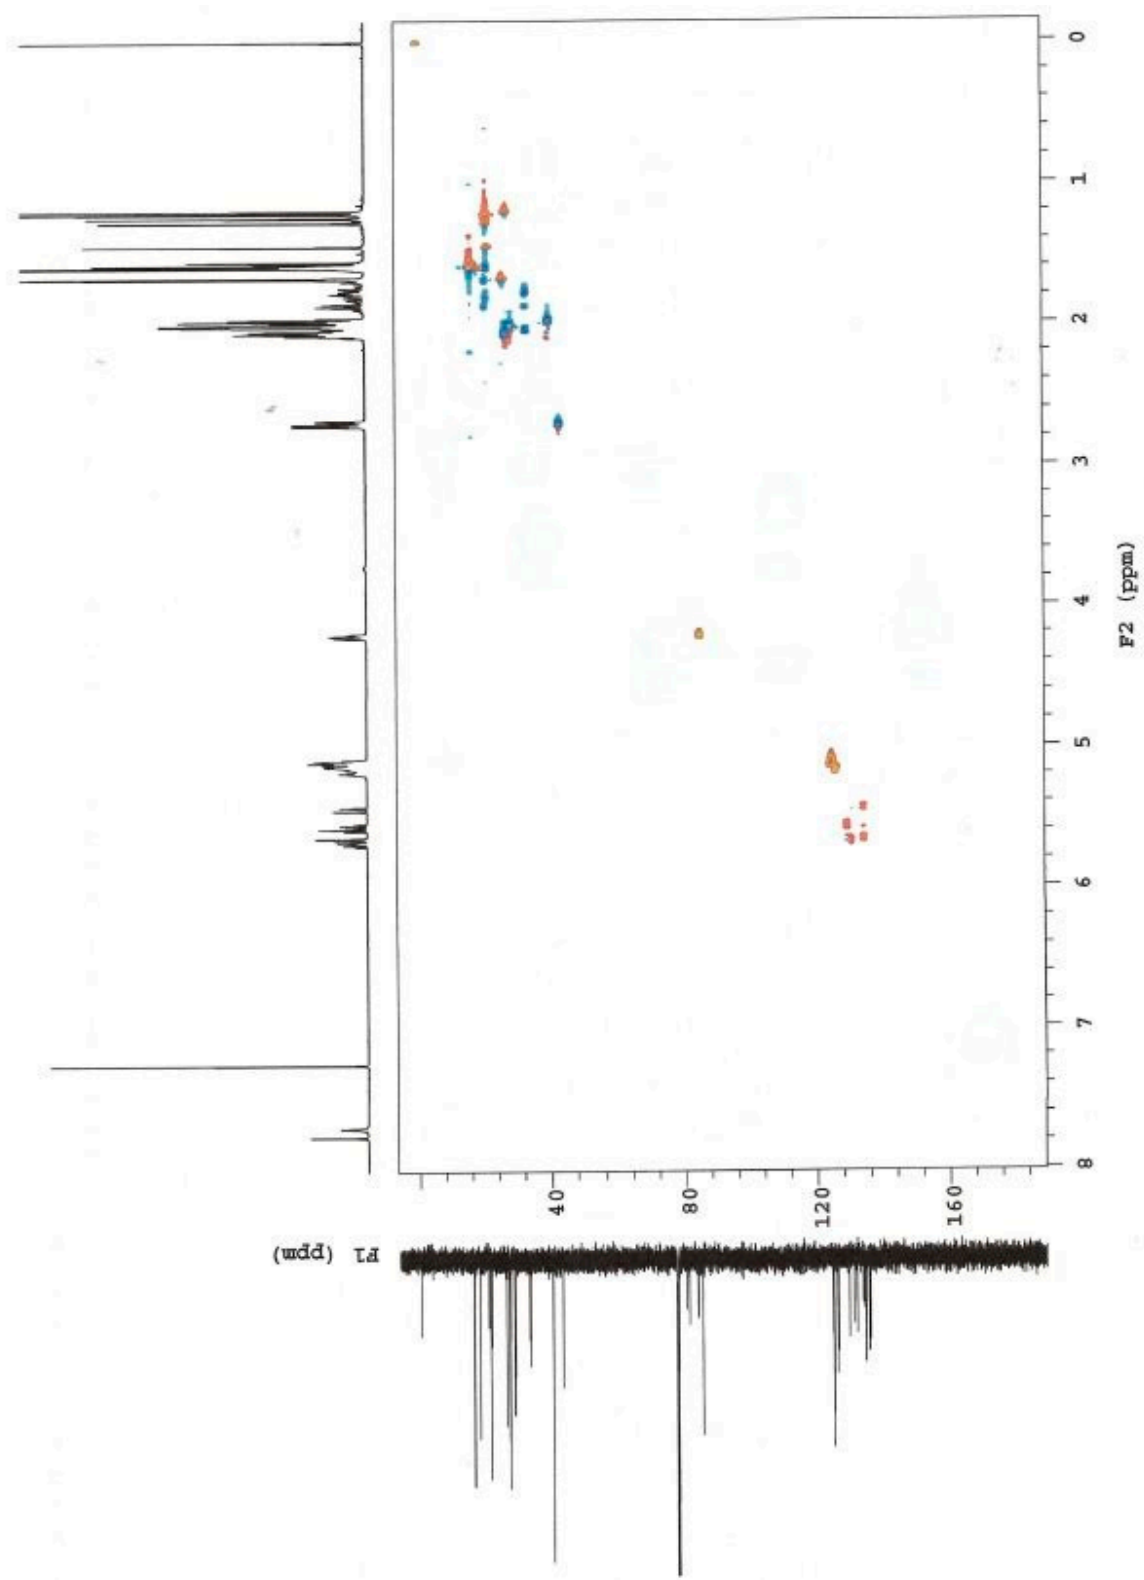

NOESY

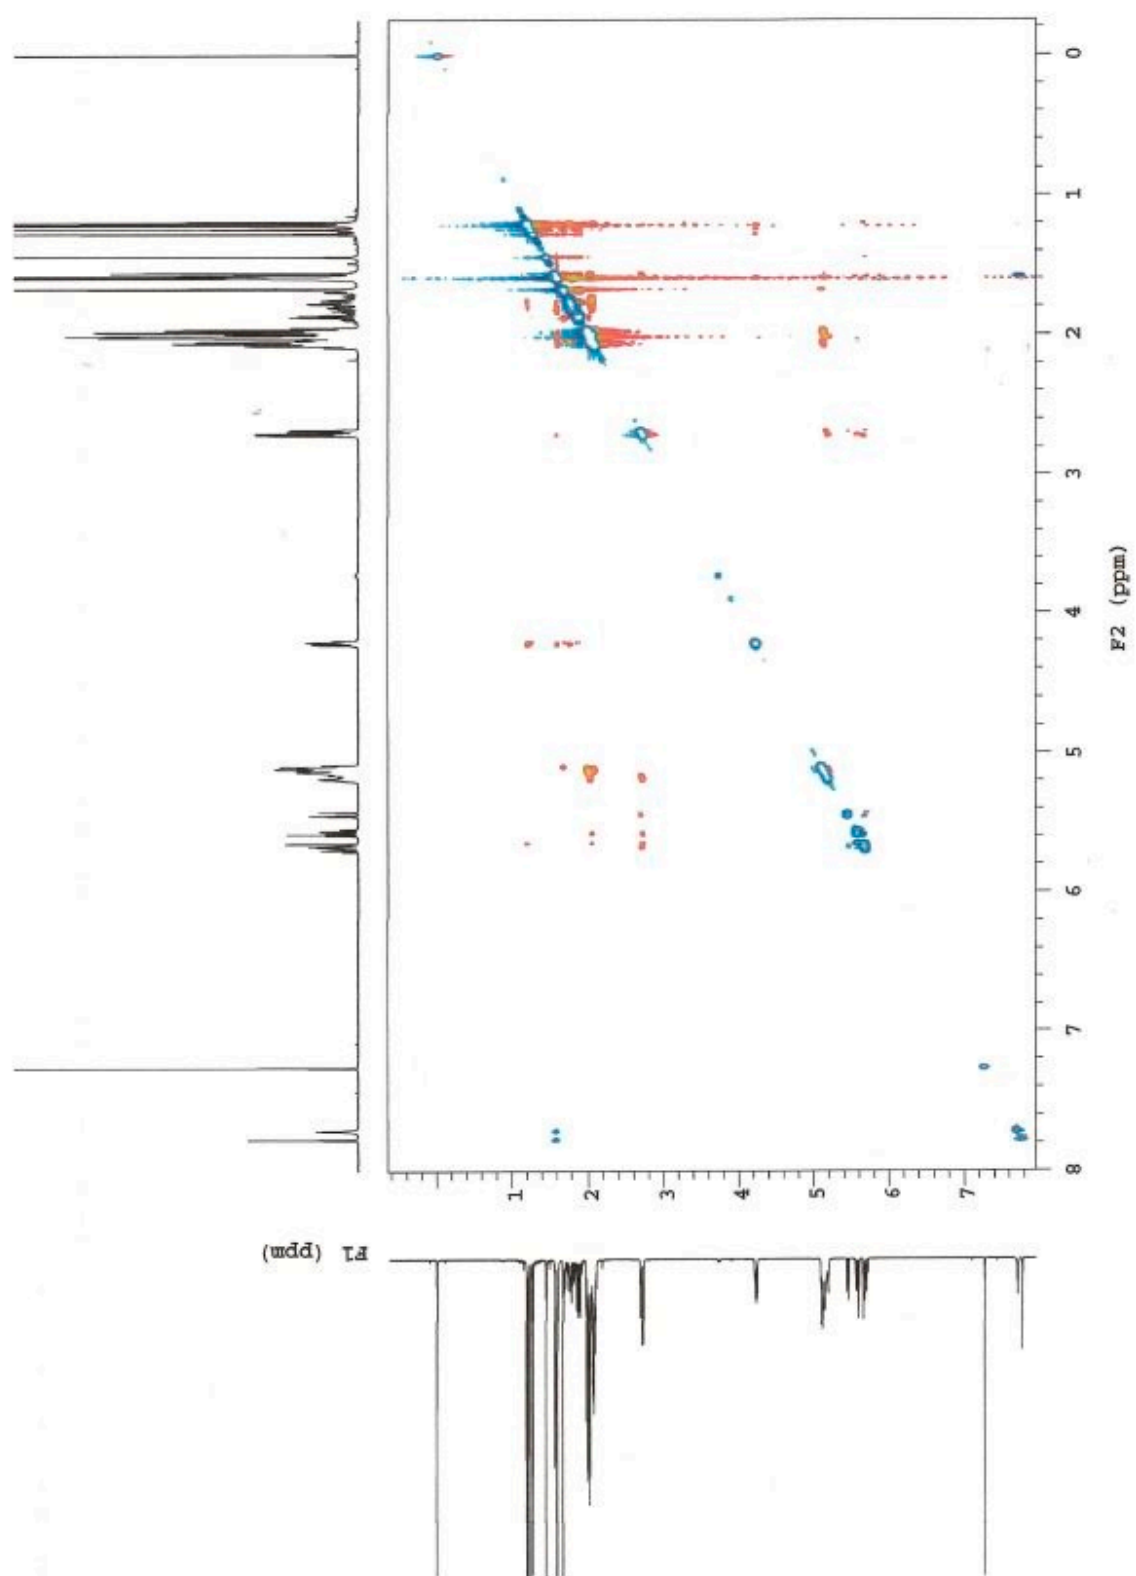



COSY

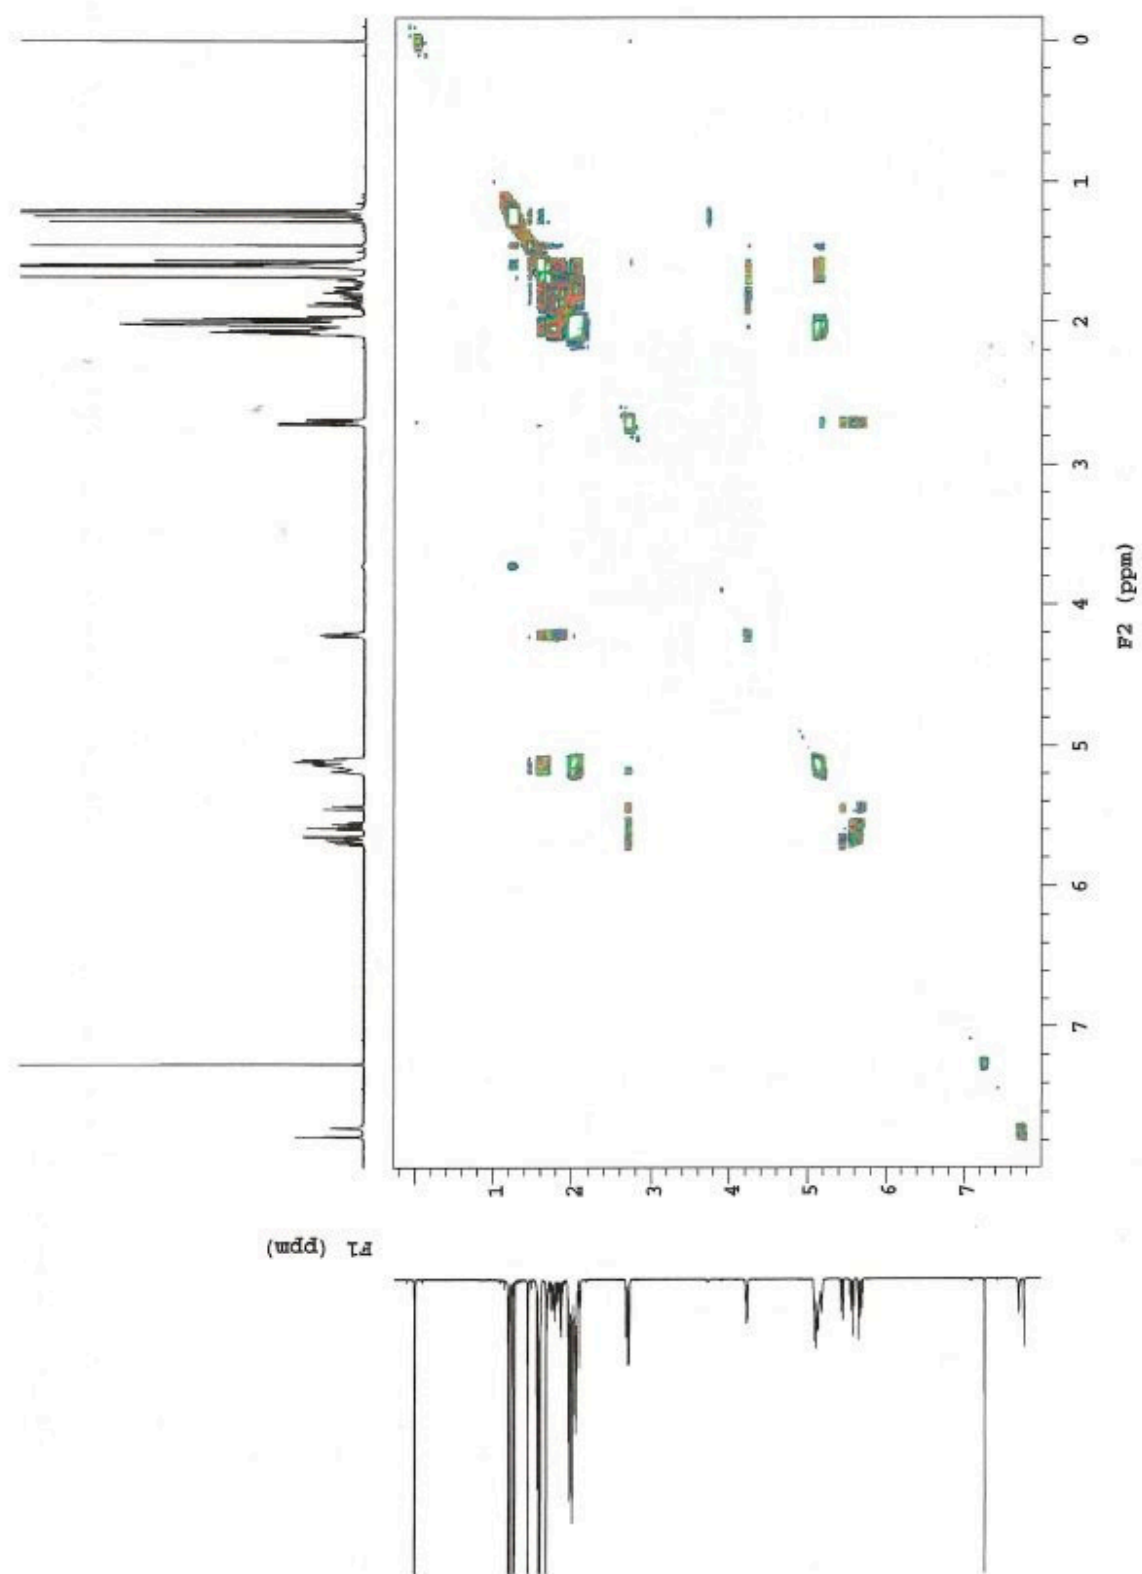

Supplement: s1 [file s1]
