# Supplementary material for: Novel Photoinduced Squalene Cyclic Peroxide Identified, Detected, and Quantified in Human Skin Surface Lipids
Source: Antioxidants (Basel). 2021 Nov 4;10(11):1760. doi: 10.3390/antiox10111760 (PMC8614752; doi:10.3390/antiox10111760)
Supplement: Supplementary file 1 [file antioxidants-10-01760-s001.zip › Supporting Information 2.xlsx]

## Sheet: 2,3-dioxetane-relSR
								numbering of atoms
Conformer	MMFF94	HF	ωB97X-D	ωB97X-D	ωB97X-D	ωB97X-V	ωB97X-D
#		3-21G(*)	6-31G*	6-31G*	6-31G*	6-311+G(2DF,2P)	6-31G*
			(Energy)		(Part 2)	[6-311G*	(Energy)	2.57274
						(Energy)			Boltzman distrubution		Label	Relative Energy (kJ/mol)	Boltzmann Weights	ChemShift(C1)	ChemShift(C2)	ChemShift(C3)	ChemShift(C4)	ChemShift(C5)	ChemShift(C6)	ChemShift(C7)	ChemShift(C8)	ChemShift(C25)	ChemShift(C26)	Relative Energy (kJ/mol)
* 17	0	0	0	0	0	0	0	1	0.38869		M0001	0	0.279	27.1	87.1	93.2	24.5	29.9	82.5	133.3	124.8	20.6	24.1	0
92	8.31	3.39	0.39	0.4	0.4	1.92	0.4	0.459812	0.178724		M0002	0.4	0.237	25.7	89.4	90.2	25	26.3	84.6	132.6	126.4	21.4	23.3	0.4
289	27.02	11.71	2.84	2.28	2.22	3.03	2.22	0.293433	0.114055		M0003	2.22	0.114	26.5	88	91.1	24.6	24.5	86	134.5	123.6	22.2	24.9	2.22
44	3.47	5.65	1.64	0.76	0.76	3.12	0.76	0.282939	0.109976		M0004	0.76	0.205	25.8	89.5	90.2	25.3	28	84.1	135.9	121.7	21.4	20	0.76
88	7.66	13	6.61	5.25	5.23	5.27	5.23	0.118537	0.0460741		M0005	5.23	0.034	27.3	86.6	92.6	24.3	33.2	84.4	134.7	124.7	20.8	21.8	5.23
207	20.5	10.54	5.26	4.49	4.49	5.57	4.49	0.104986	0.040807		M0006	4.49	0.046	25.1	89	95.1	24.6	35.2	81.9	132.5	127.1	21	25	4.49
2	-4.89	29.8	14.35	9.07	9.07	7.72	9.07	0.0439836	0.017096		M0007	9.07	0.007	27.6	87.8	90.4	23.8	26	83.3	134.3	130.3	21.2	22.6	9.07
269	25.43	34.83	10.11	9.09	9.09	7.93	9.09	0.0404004	0.0157032		M0008	9.09	0.007	27.3	89.1	93.5	26.7	36.9	84.6	134.9	130.7	23	17.1	9.09
1	-5.11	17.32	9.69	7.79	7.78	7.98	7.78	0.0395912	0.0153887		M0009	7.78	0.012	28.1	86	86.8	28.3	29.8	85.3	131.7	125	22.1	25.3	7.78
339	31.87	28.36	11.33	8.93	8.93	8.05	8.93	0.0384855	0.0149589		M0010	8.93	0.008	27.4	87.9	90.2	23.3	30.6	84.7	136.7	125.1	21.3	24.6	8.93
306	28.33	31.34	10.52	8.71	8.71	8.18	8.71	0.0365133	0.0141924		M0011	8.71	0.008	27.6	88.9	93.5	26.8	39.6	85.1	136.8	124.3	23.1	20.9	8.71
328	30.69	17.27	8.4	8.4	8.39	8.33	8.39	0.0343629	0.0133565		M0012	8.39	0.009	27	86.8	92.6	27.4	38.6	84.5	135.7	124.6	21.7	24.2	8.39
299	27.99	15.75	9.59	8	7.99	8.92	7.99	0.0270647	0.0105198		M0013	7.99	0.011	28.2	88.2	93.7	24.3	31	84.2	136	122.2	21.2	19.1	7.99
344	32.45	15.16	9.61	8.92	8.88	8.93	8.88	0.0269554	0.0104773		M0014	8.88	0.008	28.2	88.2	93.5	24.4	29.2	84.6	131.8	126.3	21.1	23.2	8.88
188	18.52	12.91	6.66	7.17	7.17	9.05	7.17	0.0256778	0.00998071		M0015	7.17	0.015	26.1	88.6	90.7	24.2	30.7	84.5	130.6	128.5	22.2	27.7	7.17
#	729	366	157	30	16	16	15				Boltz Avgs	1.6	0.193	26.4	88.4	91.6	24.9	28.6	84	133.8	124.6	21.3	23.1	1.6
%Low	0.126	0.623	0.312	0.269	0.277	0.385	0.279				Ave(wB97X-V)			26.6164	88.0302	91.9374	24.812	29.1183	83.7596	133.765	124.907	21.1982	23.3483
Conformer											cal			26.6	88	91.9	24.8	29.1	83.8	133.8	124.9	21.2	23.3
ΔE (kJ/mol)	4.05	1.99	2.1	1.97	1.64	2.57	1.6				exp (major)			21	83.3	84.7	20.4	32.9	80.7	134	129	21	26.9
Time	14.62	07:11:50.040000	03:33:14.320000	06:51:47.480000	00:11:56.440000	01:12:25.300000	00:44:14.970000				deviation			5.6	4.7	7.2	4.4	-3.8	3.1	-0.2	-4.1	0.2	-3.6
											(deviation)^2			31.36	22.09	51.84	19.36	14.44	9.61	0.04	16.81	0.04	12.96		178.55	17.855
											RMS (major)			4.22552
											Max absolute			7.2
											Mean absolute			3.65
											exp (minor)			20.9	83.2	84.7	20.4	32.7	79.9	134.1	130.4	21.2	20.9
											deviation			5.7	4.8	7.2	4.4	-3.6	3.9	-0.3	-5.5	0	2.4
											(deviation)^2			32.49	23.04	51.84	19.36	12.96	15.21	0.09	30.25	0	5.76		191	19.1
											RMS (minor)			4.37035
											Max absolute			7.2
											Mean absolute			3.4

## Sheet: 2,3-dioxetane-relSS
								numbering of atoms
Conformer	MMFF94	HF	ωB97X-D	ωB97X-D	ωB97X-D	ωB97X-V	ωB97X-D
#		3-21G(*)	6-31G*	6-31G*	6-31G*	6-311+G(2DF,2P)	6-31G*
			(Energy)		(Part 2)	[6-311G*	(Energy)	1.28915
						(Energy)			Boltzman distrubution		Label	Relative Energy (kJ/mol)	Boltzmann Weights	ChemShift(C1)	ChemShift(C2)	ChemShift(C3)	ChemShift(C4)	ChemShift(C5)	ChemShift(C6)	ChemShift(C7)	ChemShift(C8)	ChemShift(C25)	ChemShift(C26)
* 1	0	0	0	0	0	0	0	1	0.775707		M0001	0	0.774	25.8	89.3	90.2	25.5	27.2	83.3	133.6	124.4	21.4	25.8
60	11.11	10.05	3.9	3.76	3.76	4.37	3.76	0.170615	0.132348		M0002	3.76	0.17	25.8	89.3	90.4	24.9	25.4	85.8	134.6	123.8	21.5	27.5
232	25.04	10.25	8.34	7.57	7.53	6.1	7.53	0.0847206	0.0657183		M0003	7.53	0.037	28	88.3	93.8	24.8	29.8	83.5	133.6	125.1	21.1	24.4
293	29.84	20.05	10.7	9.25	9.24	8.37	9.24	0.0338112	0.0262276		M0004	9.24	0.019	28	88.4	93.6	26.3	27.2	86.9	135.1	123.7	21.1	25.4
#	729	391	78	7	4	4	4				Boltz Avgs	1.09	0.63	25.9	89.3	90.5	25.4	27	83.8	133.8	124.3	21.4	26
%Low	0.176	0.912	0.767	0.753	0.774	0.775	0.774				Ave(wB97X-V)			26.0023	89.2107	90.5522	25.3956	27.1326	83.7384	133.772	124.348	21.3857	25.9225
Conformer											cal			26	89.2	90.6	25.4	27.1	83.7	133.8	124.3	21.4	25.9
ΔE (kJ/mol)	4.43	0.99	1.45	1.37	1.09	1.21	1.09				exp (major)			21	83.3	84.7	20.4	32.9	80.7	134	129	21	26.9
Time	14.34	03:42:21	01:04:54.360000	02:02:14.970000	00:07:45.240000	00:17:56.710000	00:12:15.810000				deviation			5	5.9	5.9	5	-5.8	3	-0.2	-4.7	0.4	-1
											(deviation)^2			25	34.81	34.81	25	33.64	9	0.04	22.09	0.16	1		185.55	18.555
											RMS (major)			4.30755
											Max absolute			5.9
											Mean absolute			3.61
											exp (minor)			20.9	83.2	84.7	20.4	32.7	79.9	134.1	130.4	21.2	20.9
											deviation			5.1	6	5.9	5	-5.6	3.8	-0.3	-6.1	0.2	5
											(deviation)^2			26.01	36	34.81	25	31.36	14.44	0.09	37.21	0.04	25		229.96	22.996
											RMS (minor)			4.79541
											Max absolute			6
											Mean absolute			3.88

## Sheet: 3,6-dioxane-cis
								numbering of atoms
Conformer	MMFF94	HF	ωB97X-D	ωB97X-D	ωB97X-D	ωB97X-V	ωB97X-D
#		3-21G(*)	6-31G*	6-31G*	6-31G*	6-311+G(2DF,2P)	6-31G*
			(Energy)		(Part 2)	[6-311G*	(Energy)	3.33125
						(Energy)			Boltzman distrubution		Label	Relative Energy (kJ/mol)	Boltzmann Weights	ChemShift(C1)	ChemShift(C2)	ChemShift(C3)	ChemShift(C4)	ChemShift(C5)	ChemShift(C6)	ChemShift(C7)	ChemShift(C8)	ChemShift(C25)	ChemShift(C26)
6	-21.89	-0.86	8.89	8.53	8.52	4.28	8.52	0.176944	0.0531163		M0007	8.52	0.012	22.3	83.4	83.5	19.9	30.3	80.5	137.6	123.8	18.6	26.9
15	-17.51	-5.28	8.79	8.97	8.97	4.79	8.97	0.143949	0.0432116		M0009	8.97	0.01	22.5	83.5	83	20.5	34.5	80.6	131.8	128	18.8	27.5
18	-15.83	2.96	3.13	4.92	4.92	3.78	4.92	0.216623	0.0650275		M0005	4.92	0.049	18.4	82.7	91.5	22.8	30.2	81.2	136.6	124.5	23.2	26.8
26	-13.64	6.34	5.37	5.47	5.47	3.52	5.47	0.240656	0.072242		M0004	5.47	0.039	20.5	83.4	82.6	22.1	30.4	81	137	124.3	22.5	27
31	-11.43	-1.07	3.15	5.89	5.89	4.33	5.89	0.1734	0.0520524		M0008	5.89	0.033	18.4	82.8	91.4	23.3	34.2	81.1	130.5	129	23.1	27.4
32	-11.28	4.99	8.51	9.76	9.76	8.88	9.76	0.0275064	0.00825707		M0011	9.76	0.007	22.8	82.4	88.7	20.4	35.1	79.9	131.1	125.1	21.9	23.7
43	-7.36	1.55	3.65	6.05	6.05	3.48	6.05	0.244583	0.0734208		M0003	6.05	0.031	20.3	83.5	82.7	22.5	34.3	81	130.6	129.2	22.5	27.4
57	-1.02	0.81	5.45	7.21	7.21	9.76	7.21	0.0192656	0.00578329		M0013	7.21	0.02	25.9	85.1	83.7	19.4	28.8	79.4	135.1	124.4	21.9	22.5
58	-0.91	4.06	4.31	5.89	5.89	8.56	5.89	0.031309	0.00939858		M0010	5.89	0.033	25.8	84.9	83.4	19.5	25.9	80.6	133.2	129.5	21.8	21.8
* 60	0	0	0	0	0	0	0	1	0.300188		M0001	0	0.359	22.7	82.7	86.1	19.8	28.7	80.2	135	128.4	21.2	26.1
65	1.25	3.49	4.84	6.5	6.49	9.32	6.49	0.0230201	0.00691036		M0012	6.49	0.026	25.7	84.8	82.7	19.8	29.3	81.8	134.4	127.5	22	18
73	4.16	-4.68	-0.74	0.21	0.21	0.47	0.21	0.826804	0.248196		M0002	0.21	0.329	22.7	82.5	87.1	20.5	33.8	80.7	133.4	128.8	21.5	27.5
84	7.7	4.34	7.19	4.81	4.81	3.89	4.81	0.207192	0.0621965		M0006	4.81	0.051	18.3	82.8	91.1	22.7	30.1	81.2	136.6	124.5	23.2	26.7
#	164	95	75	20	14	14	13				Boltz Avgs	1.92	0.248	22.2	82.9	86.6	20.6	31	80.6	134.3	127.9	21.7	26.3
%Low	0.441	0.183	0.306	0.31	0.354	0.285	0.359				Ave(wB97X-V)			21.6271	82.8894	86.4704	20.9311	31.3375	80.6556	134.341	127.489	21.5964	26.7244
Conformer											cal			21.6	82.9	86.5	20.9	31.3	80.7	134.3	127.5	21.6	26.7
ΔE (kJ/mol)	3.38	2.31	2.7	2.44	2	2.17	1.92				exp (major)			21	83.3	84.7	20.4	32.9	80.7	134	129	21	26.9
Time	2.83	01:17:36.880000	01:38:15.420000	06:12:01.370000	00:08:22.300000	01:28:52.830000	00:57:06.410000				deviation			0.6	-0.4	1.8	0.5	-1.6	0	0.3	-1.5	0.6	-0.2
											(deviation)^2			0.36	0.16	3.24	0.25	2.56	0	0.09	2.25	0.36	0.04		9.31	0.931
											RMS (major)			0.964883
											Max absolute			1.8
											Mean absolute			0.75
											exp (minor)			20.9	83.2	84.7	20.4	32.7	79.9	134.1	130.4	21.2	20.9
											deviation			0.7	-0.3	1.8	0.5	-1.4	0.8	0.2	-2.9	0.4	5.8
											(deviation)^2			0.49	0.09	3.24	0.25	1.96	0.64	0.04	8.41	0.16	33.64		48.92	4.892
											RMS (minor)			2.21179
											Max absolute			5.8
											Mean absolute			1.372

## Sheet: 3,6-dioxane-trans
								numbering of atoms
Conformer	MMFF94	HF	ωB97X-D	ωB97X-D	ωB97X-D	ωB97X-V	ωB97X-D
#		3-21G(*)	6-31G*	6-31G*	6-31G*	6-311+G(2DF,2P)	6-31G*
			(Energy)		(Part 2)	[6-311G*	(Energy)	5.0586
						(Energy)			Boltzman distrubution		Label	Relative Energy (kJ/mol)	Boltzmann Weights	ChemShift(C1)	ChemShift(C2)	ChemShift(C3)	ChemShift(C4)	ChemShift(C5)	ChemShift(C6)	ChemShift(C7)	ChemShift(C8)	ChemShift(C25)	ChemShift(C26)
18	-28.63	6.16	4.41	8.39	8.39	2.97	8.39	0.300645	0.0594323		M0007	8.39	0.014	20.3	83.4	82.8	22.3	32.9	78.9	133.8	122.8	22.5	21.7
20	-28.19	2.52	3.14	7.42	7.42	3.19	7.42	0.275037	0.0543701		M0010	7.42	0.021	18.3	82.7	91.7	23	32.6	79.2	133.5	123.1	23.2	21.6
21	-27.95	9.12	2.25	6.47	6.46	3.3	6.46	0.263063	0.0520031		M0011	6.46	0.031	18.2	82.7	91.6	23	30.2	80.7	135.1	125.5	23.3	22.4
26	-26.18	8.56	2.27	6.32	6.32	3.09	6.32	0.286395	0.0566153		M0009	6.32	0.033	18.2	82.7	91.2	23.1	33.6	81.1	134.6	126.5	23.2	18.3
37	-23.52	0.38	3.38	6.59	6.58	2.56	6.58	0.354901	0.0701578		M0003	6.58	0.03	22.7	82.4	88.8	20.4	31.9	78.9	133.5	123.2	21.9	21.5
38	-23.46	6.76	2.82	5.78	5.78	2.74	5.78	0.329969	0.0652293		M0004	5.78	0.041	22.7	82.3	88.7	20.4	29.6	80.5	135.1	125.5	21.9	22.3
43	-22.25	6.73	2.95	6.05	6.05	2.83	6.05	0.318169	0.0628965		M0005	6.05	0.037	22.7	82.5	88.5	20.5	33.2	81	134.6	126.1	22	18.1
53	-19.02	5.02	7.9	9.72	9.72	3.93	9.72	0.203865	0.0403007		M0013	9.72	0.008	22.5	83.5	83.3	20.2	30.4	80.2	136	124.5	18.7	22.7
56	-17.31	4.76	8.08	9.78	9.78	3.87	9.78	0.208876	0.0412912		M0012	9.78	0.008	22.6	83.6	83	20.5	34.2	80.9	136	124.7	18.7	18.7
76	-9.17	12.81	3.56	7.24	7.23	3	7.23	0.297017	0.0587152		M0008	7.23	0.023	20.3	83.4	82.8	22.2	30.5	80.6	135.6	125	22.7	22.4
79	-7.5	12.41	3.84	7.41	7.41	2.84	7.41	0.316884	0.0626425		M0006	7.41	0.021	20.3	83.5	82.5	22.5	34.1	81.1	135.1	126	22.6	18.4
104	-0.73	-4.97	-2.48	0.76	0.76	0.25	0.76	0.903785	0.178663		M0002	0.76	0.311	25.5	84.9	83.2	19.9	29.5	82	130.2	129	22.3	28.1
* 108	0	0	0	0	0	0	0	1	0.197683		M0001	0	0.422	25.7	85.1	83.5	19.3	26.3	81.8	135.5	124.8	21.8	27.5
#	164	116	72	21	13	13	13				Boltz Avgs	2.06	0.282	24.3	84.4	84.6	20.1	28.8	81.5	133.6	126.2	22.1	25.8
%Low	0.241	0.375	0.409	0.408	0.422	0.197	0.422				Ave(wB97X-V)			22.6192	83.71	85.6009	20.8752	30.4914	80.8707	134.07	125.558	22.0405	23.378
Conformer											cal			22.6	83.7	85.6	20.9	30.5	80.9	134.1	125.6	22	23.4
ΔE (kJ/mol)	2.65	3.35	3.16	2.37	2.06	1.95	2.06				exp (major)			21	83.3	84.7	20.4	32.9	80.7	134	129	21	26.9
Time	2.35	01:38:22.650000	01:33:58.430000	05:21:34.410000	00:11:18.830000	01:28:52.130000	01:01:13.540000				deviation			1.6	0.4	0.9	0.5	-2.4	0.2	0.1	-3.4	1	-3.5
											(deviation)^2			2.56	0.16	0.81	0.25	5.76	0.04	0.01	11.56	1	12.25		34.4	3.44
											RMS (major)			1.85472
											Max absolute			3.4
											Mean absolute			1.584
											exp (minor)			20.9	83.2	84.7	20.4	32.7	79.9	134.1	130.4	21.2	20.9
											deviation			1.7	0.5	0.9	0.5	-2.2	1	0	-4.8	0.8	2.5
											(deviation)^2			2.89	0.25	0.81	0.25	4.84	1	0	23.04	0.64	6.25		39.97	3.997
											RMS (minor)			1.99925
											Max absolute			4.7
											Mean absolute			1.454

## Sheet: 4,6-dioxolane-cis
								numbering of atoms
Conformer	MMFF94	HF	ωB97X-D	ωB97X-D	ωB97X-D	ωB97X-V	ωB97X-D
#		3-21G(*)	6-31G*	6-31G*	6-31G*	6-311+G(2DF,2P)	6-31G*
			(Energy)		(Part 2)	[6-311G*	(Energy)	2.74872
						(Energy)			Boltzman distrubution		Label	Relative Energy (kJ/mol)	Boltzmann Weights	ChemShift(C1)	ChemShift(C2)	ChemShift(C3)	ChemShift(C4)	ChemShift(C5)	ChemShift(C6)	ChemShift(C7)	ChemShift(C8)	ChemShift(C25)	ChemShift(C26)
1	-26.85	-3.99	1.47	1.63	1.63	1.25	1.63	0.603012	0.219379		M0002	1.63	0.195	25.7	79.7	41.4	81	53.1	84.2	132	123.2	23.3	27.2
3	-23.91	-0.43	6.41	5.14	5.13	3.04	5.13	0.292248	0.106322		M0003	5.13	0.048	25.1	79.8	39	80.2	51.7	86	133.1	123.4	24.1	25
5	-23.39	5.97	6.91	7.02	7.02	5.33	7.02	0.115693	0.0420899		M0006	7.02	0.022	25.2	79.5	39.4	79.2	52.3	85.8	136.5	121	24.2	20.9
11	-22.24	3.61	4.94	4.46	4.46	3.62	4.46	0.231112	0.08408		M0004	4.46	0.062	25.7	79.5	43	80.1	49.5	87.1	132.8	126	23.5	27.6
54	-14.91	11.99	5.09	2.79	2.79	6.02	2.79	0.0875081	0.031836		M0007	2.79	0.122	23	80.8	35	80	48.8	83.4	137.7	125	27.2	27.7
120	-9.32	19.15	7.94	5.82	5.82	9.05	5.82	0.0256778	0.00934173		M0011	5.82	0.036	23.1	81.2	34.3	80.1	46.4	86.3	138.3	127.3	27.3	29.4
176	-4.7	8.74	10.11	9.87	9.85	8.09	9.85	0.0378676	0.0137764		M0010	9.85	0.007	25.1	79.5	39.7	80.1	53.4	87	142.8	126	24.1	26
203	-1.89	6.47	5.58	5.25	5.25	6.74	5.25	0.0653907	0.0237895		M0008	5.25	0.045	27.1	80.3	38.3	80.3	52.5	85.3	132.5	124.1	22.2	27.8
* 219	0	0	0	0	0	0	0	1	0.363806		M0001	0	0.377	25.6	79.6	42.5	79.7	53	85.8	132.8	127.6	23.5	22.6
233	1.74	6.33	7.19	7.64	7.64	7.22	7.64	0.0538469	0.0195898		M0009	7.64	0.017	27.9	79.3	42.7	80.1	52.3	86.2	132.6	123.7	22.2	24.8
236	1.79	13.33	9.71	9.69	9.69	9.7	9.69	0.0197391	0.00718119		M0012	9.69	0.008	27.9	79.3	42.7	79.4	52.7	85.9	136.2	121.3	22.3	20.9
246	2.6	3.41	5.21	4.55	4.55	3.78	4.55	0.216623	0.0788087		M0005	4.55	0.06	25.6	79.6	42.8	80.2	50.1	87.1	133.1	126.1	23.6	27.8
#	488	312	200	22	14	14	12				Boltz Avgs	2.33	0.209	25.3	79.9	40.7	80.1	51.8	85.4	133.6	125.6	24	25.3
%Low	0.206	0.455	0.392	0.348	0.372	0.359	0.377				Ave(wB97X-V)			25.5446	79.691	41.3733	80.1291	52.1138	85.6235	133.194	125.345	23.6538	25.0503
Conformer											cal			25.5	79.7	41.4	80.1	52.1	85.6	133.2	125.3	23.7	25.1
ΔE (kJ/mol)	4.56	2.77	2.91	2.75	2.44	2.28	2.33				exp (major)			21	83.3	20.4	84.7	32.9	80.7	134	129	21	26.9
Time	10.59	03:50:04.760000	03:49:58.180000	08:56:16.510000	00:08:42.980000	01:05:25.800000	00:36:15.390000				deviation			4.5	-3.6	21	-4.6	19.2	4.9	-0.8	-3.7	2.7	-1.8
											(deviation)^2			20.25	12.96	441	21.16	368.64	24.01	0.64	13.69	7.29	3.24		912.88	91.288
											RMS (major)			9.55448
											Max absolute			21
											Mean absolute			6.896
											exp (minor)			20.9	83.2	20.4	84.7	32.7	79.9	134.1	130.4	21.2	20.9
											deviation			4.6	-3.5	21	-4.6	19.4	5.7	-0.9	-5.1	2.5	4.2
											(deviation)^2			21.16	12.25	441	21.16	376.36	32.49	0.81	26.01	6.25	17.64		955.13	95.513
											RMS (minor)			9.77308
											Max absolute			21
											Mean absolute			6.676

## Sheet: 4,6-dioxolane-trans
								numbering of atoms
Conformer	MMFF94	HF	ωB97X-D	ωB97X-D	ωB97X-D	ωB97X-V	ωB97X-D
#		3-21G(*)	6-31G*	6-31G*	6-31G*	6-311+G(2DF,2P)	6-31G*
			(Energy)		(Part 2)	[6-311G*	(Energy)	2.8541
						(Energy)			Boltzman distrubution		Label	Relative Energy (kJ/mol)	Boltzmann Weights	ChemShift(C1)	ChemShift(C2)	ChemShift(C3)	ChemShift(C4)	ChemShift(C5)	ChemShift(C6)	ChemShift(C7)	ChemShift(C8)	ChemShift(C25)	ChemShift(C26)
1	-28.39	4.8	7.61	5.98	5.98	5.43	5.98	0.111105	0.0389284		M0001	0	0.337	25.5	79.7	43	80.6	52.3	84.9	132	124.5	23.4	24.7
4	-26.28	11.25	4.89	4.95	4.95	4.38	4.95	0.169926	0.0595378		M0002	0.1	0.323	25.6	79.7	42.6	80.6	52.4	84.8	132.2	124.3	23.5	25.1
14	-23.95	0.14	0.73	0.1	0.1	0.24	0.1	0.90745	0.317947		M0003	2.14	0.143	25.6	79.7	42.9	79.5	53.1	85.2	135.5	121.8	23.3	20.9
18	-22.99	12.91	10.12	9.36	8.89	9.73	8.89	0.0195009	0.0068326		M0004	3.31	0.089	25.7	79.8	43.5	79.5	53	86	140.3	125.5	23.3	23.9
151	-8.98	14.97	9.76	9.51	9.51	8.32	9.51	0.0345022	0.0120887		M0005	4.95	0.046	25.3	79.6	39.6	79.5	52.8	86.7	133.4	126.6	24.1	23.8
206	-1.13	18.87	8.25	7.59	7.59	8.61	7.59	0.0306819	0.0107501		M0006	5.98	0.03	25.2	79.6	37.3	78.6	52.7	85.4	132.9	125	24.1	27.6
211	-0.62	6.03	2.58	2.16	2.14	2.7	2.14	0.335354	0.117499		M0007	9.51	0.007	25.3	79.7	40	79.5	49.6	88.2	133.1	125.1	24	28.9
* 221	0	0	0	0	0	0	0	1	0.350374		M0008	7.59	0.016	27.9	79.3	43.1	79.7	53.3	86.9	133	127	22.2	23.7
255	3.96	8.03	4.43	3.31	3.31	3.47	3.31	0.245575	0.086043		M0009	8.89	0.009	27.9	79.3	41.6	79	53.5	85.5	132.6	124.6	22.3	27.6
#	488	287	169	18	13	13	9				Boltz Avgs	1.31	0.25	25.6	79.7	42.5	80.2	52.5	85.2	133.4	124.3	23.4	24.3
%Low	0.126	0.381	0.374	0.319	0.325	0.344	0.337				Ave(wB97X-V)			26.5574	79.5238	42.4075	79.6257	52.7118	86.1642	133.739	124.622	22.9449	23.9231
Conformer											cal			26.6	79.5	42.4	79.6	52.7	86.1	133.7	124.6	22.9	23.9
ΔE (kJ/mol)	3.46	1.85	2.05	1.75	1.58	1.58	1.31				exp (major)			21	83.3	20.4	84.7	32.9	80.7	134	129	21	26.9
Time	9.43	03:23:28.400000	03:07:08.570000	08:04:25.930000	00:24:17.150000	01:16:03.370000	00:37:10.390000				deviation			5.6	-3.8	22	-5.1	19.8	5.4	-0.3	-4.4	1.9	-3
											(deviation)^2			31.36	14.44	484	26.01	392.04	29.16	0.09	19.36	3.61	9		1009.07	100.907
											RMS (major)			10.0452
											Max absolute			22
											Mean absolute			7.512
											exp (minor)			20.9	83.2	20.4	84.7	32.7	79.9	134.1	130.4	21.2	20.9
											deviation			5.7	-3.7	22	-5.1	20	6.2	-0.4	-5.8	1.7	3
											(deviation)^2			32.49	13.69	484	26.01	400	38.44	0.16	33.64	2.89	9		1040.32	104.032
											RMS (minor)			10.1996
											Max absolute			20
											Mean absolute			7.292

## Sheet: 2,4-dioxolane-relSR
								numbering of atoms
Conformer	MMFF94	HF	ωB97X-D	ωB97X-D	ωB97X-D	ωB97X-V	ωB97X-D
#		3-21G(*)	6-31G*	6-31G*	6-31G*	6-311+G(2DF,2P)	6-31G*
			(Energy)		(Part 2)	[6-311G*	(Energy)	1.45885
						(Energy)			Boltzman distrubution		Label	Relative Energy (kJ/mol)	Boltzmann Weights	ChemShift(C1)	ChemShift(C2)	ChemShift(C3)	ChemShift(C4)	ChemShift(C5)	ChemShift(C6)	ChemShift(C7)	ChemShift(C8)	ChemShift(C25)	ChemShift(C26)
* 5	0	0	0	0	0	0	0	1	0.685473		M0001	0	0.683	26.4	82.7	52	80.2	42.1	82	133.2	125.6	24.4	24.6
7	1.05	17.97	10.7	8.71	8.71	7.78	8.71	0.0429286	0.0294264		M0004	8.71	0.02	24.5	83.9	51.6	80.6	35.2	84.4	134.6	123.1	27.7	25.2
10	2.1	11.12	4.13	2.77	2.77	3.34	2.77	0.258839	0.177427		M0002	2.77	0.223	26.5	82.8	52.4	81	39.3	84.7	135	122.8	24.5	25.5
18	5.32	21.66	11.07	9.04	9.04	9.54	9.04	0.0210594	0.0144356		M0005	9.04	0.018	24.3	84.4	51.8	80.2	39.5	83.3	138.5	122	27.6	27.7
88	15.46	6.68	5.71	6.23	6.23	4.93	6.23	0.13602	0.0932383		M0003	6.23	0.055	24.6	83.8	51.5	79.4	38.7	81.7	133	125.7	27.7	24.3
#	488	248	67	10	6	6	5				Boltz Avgs	1.3	0.52	26.2	82.9	52.1	80.4	41.1	82.7	133.7	124.8	24.7	24.9
%Low	0.208	0.812	0.633	0.539	0.671	0.665	0.683				Ave(wB97X-V)			26.1637	82.8802	52.0097	80.2791	41.0456	82.5405	133.618	124.987	24.8687	24.7941
Conformer											cal			26.2	82.9	52	80.3	41	82.5	133.6	125	24.9	24.8
ΔE (kJ/mol)	3.36	1.4	1.96	1.85	1.44	1.61	1.3				exp (major)			21	83.3	20.4	84.7	32.9	80.7	134	129	21	26.9
Time	7.8	03:28:13.320000	01:09:43.910000	04:39:31.870000	00:04:11.210000	00:35:05.410000	00:27:37.140000				deviation			5.2	-0.4	31.6	-4.4	8.1	1.8	-0.4	-4	3.9	-2.1
											(deviation)^2			27.04	0.16	998.56	19.36	65.61	3.24	0.16	16	15.21	4.41		1149.75	114.975
											RMS (major)			10.7226
											Max absolute			31.6
											Mean absolute			6.622
											exp (minor)			20.9	83.2	20.4	84.7	32.7	79.9	134.1	130.4	21.2	20.9
											deviation			5.3	-0.3	31.6	-4.4	8.3	2.6	-0.5	-5.4	3.7	3.9
											(deviation)^2			28.09	0.09	998.56	19.36	68.89	6.76	0.25	29.16	13.69	15.21		1180.06	118.006
											RMS (minor)			10.8631
											Max absolute			31.6
											Mean absolute			6.352

## Sheet: 2,4-dioxolane-relSS
								numbering of atoms
Conformer	MMFF94	HF	ωB97X-D	ωB97X-D	ωB97X-D	ωB97X-V	ωB97X-D
#		3-21G(*)	6-31G*	6-31G*	6-31G*	6-311+G(2DF,2P)	6-31G*
			(Energy)		(Part 2)	[6-311G*	(Energy)	3.9265
						(Energy)			Boltzman distrubution		Label	Relative Energy (kJ/mol)	Boltzmann Weights	ChemShift(C1)	ChemShift(C2)	ChemShift(C3)	ChemShift(C4)	ChemShift(C5)	ChemShift(C6)	ChemShift(C7)	ChemShift(C8)	ChemShift(C25)	ChemShift(C26)
3	-29.2	2.51	1.21	0.41	0.4	1.34	0.4	0.581446	0.148082		M0004	0.4	0.125	26.4	82.9	52	80.2	43.9	83	136.9	121.4	24.3	20.3
7	-28.81	4.6	1.97	0.21	0.21	0.92	0.21	0.689159	0.175515		M0002	0.21	0.135	26.3	82.8	52	80	43.7	82.6	136.4	121.7	24.1	19.9
8	-28.76	8.93	6.65	5.76	5.74	5.44	5.74	0.110657	0.028182		M0009	5.74	0.014	24.7	83.9	51.8	79.8	40.4	82.9	136.1	121.8	27.8	20.9
82	-17.88	2.47	-1.48	-2.18	-2.18	1.34	-2.18	0.581446	0.148082		M0003	-2.18	0.354	25.1	86	44.4	81.7	34.4	81.9	137.3	125.5	26.3	28
109	-15.28	14.11	7.08	4.84	4.84	4.13	4.84	0.188016	0.047884		M0006	4.84	0.021	24.4	83.6	52.1	79	38.6	83	131.7	125.6	27.5	24.1
129	-13.37	8.35	5.82	5.29	5.29	4.79	5.29	0.143949	0.0366608		M0008	5.29	0.017	24.6	83.9	51.8	79.8	40.1	82.4	135.5	122.2	27.7	20.5
180	-8.41	5.13	4.65	4.85	4.84	3.49	4.84	0.243595	0.0620388		M0007	4.84	0.021	24.7	83.9	51.9	79.7	37.2	81.5	141.6	122.7	27.8	24.8
219	-5.75	14.05	7.68	7.02	7.01	8.2	7.01	0.036219	0.00922423		M0011	7.01	0.009	27.9	84	51.8	79.5	39.6	83.6	137.7	120.8	25.4	19.3
229	-4.88	10.02	7.3	7.5	7.46	8.02	7.46	0.0389555	0.00992118		M0010	7.46	0.007	24.6	84.2	52.1	79.7	42	81.1	134.1	124.2	27.6	22.4
261	-1.1	10.32	1.29	-0.02	-0.05	2.87	-0.05	0.31306	0.07973		M0005	-0.05	0.15	25.4	86.1	47.5	81.4	30.1	83.9	135.6	122.6	26.9	26.7
* 277	0	0	0	0	0	0	0	1	0.25468		M0001	0	0.147	26.2	82.9	52.3	79.7	41.6	83	132	125.5	24.2	23.5
#	488	326	196	26	12	11	11				Boltz Avgs	-0.21	0.205	25.6	84.5	48.7	80.8	37.7	82.6	136	123.8	25.7	24.6
%Low	0.264	0.23	0.308	0.333	0.347	0.254	0.354				Ave(wB97X-V)			25.7401	83.7801	50.577	80.2295	39.8062	82.7075	135.468	123.544	25.3794	23.1923
Conformer											cal			25.7	83.8	50.6	80.2	39.8	82.7	135.5	123.5	25.4	23.2
ΔE (kJ/mol)	4.99	2.35	2.74	2.47	2.07	1.69	1.97				exp (major)			21	83.3	20.4	84.7	32.9	80.7	134	129	21	26.9
Time	9.72	04:15:47.210000	03:55:19.870000	08:09:20.270000	00:10:46.670000	00:48:25.940000	00:32:23.800000				deviation			4.7	0.5	30.2	-4.5	6.9	2	1.5	-5.5	4.4	-3.7
											(deviation)^2			22.09	0.25	912.04	20.25	47.61	4	2.25	30.25	19.36	13.69		1071.79	107.179
											RMS (major)			10.3527
											Max absolute			30.2
											Mean absolute			6.32
											exp (minor)			20.9	83.2	20.4	84.7	32.7	79.9	134.1	130.4	21.2	20.9
											deviation			4.8	0.6	30.2	-4.5	7.1	2.8	1.4	-6.9	4.2	2.3
											(deviation)^2			23.04	0.36	912.04	20.25	50.41	7.84	1.96	47.61	17.64	5.29		1086.44	108.644
											RMS (minor)			10.4232
											Max absolute			30.2
											Mean absolute			5.9
